# Supplementary material for: Oligomerization and Nitration of the Grass Pollen Allergen Phl p 5 by Ozone, Nitrogen Dioxide, and Peroxynitrite: Reaction Products, Kinetics, and Health Effects
Source: MDPI journal article supplement (doi:10.3390/ijms22147616), 2021-07-16
Supplement: s1 [file s1]

# Supplementary Materials: Oligomerization and Nitration of the Grass Pollen Allergen Phl p 5 by Ozone, Nitrogen Dioxide, and Peroxynitrite: Reaction Products, Kinetics, and Health Effects

Anna T. Backes <sup>1,\*</sup> , Kathrin Reinmuth-Selzle <sup>1</sup>, Anna Lena Leifke <sup>1</sup>, Kira Ziegler <sup>1</sup>, Carola S. Krevert <sup>1,†</sup>, Georg Tscheuschner <sup>2</sup>, Kurt Lucas <sup>1</sup>, Michael G. Weller <sup>2</sup>, Thomas Berkemeier <sup>1</sup>, Ulrich Pöschl <sup>1</sup>, and Janine Fröhlich-Nowoisky <sup>1,\*</sup>

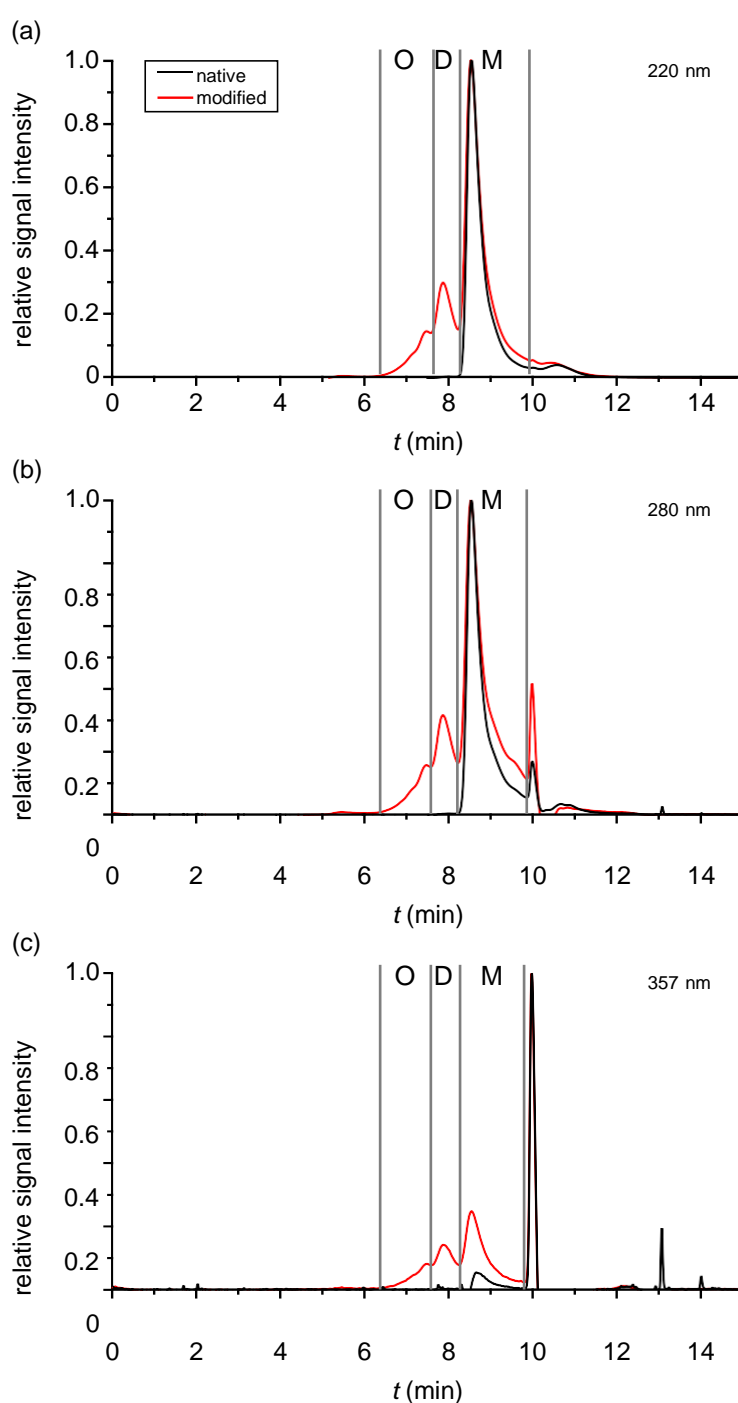

**Figure S1.** Exemplary chromatograms from the SEC-DAD analysis of Phl p 5 before (black) and after (red) exposure to  $O_3$  and  $NO_2$  measured at different wavelength: (a) 220 nm, (b) 280 nm, (c) 357 nm. Dashed grey lines separate monomer (M), dimer (D), and higher oligomer (O) fractions.

- (a)  $\text{O}_3/\text{NO}_2$  (50/50 ppb), 10 h      (b)  $\text{O}_3/\text{NO}_2$  (200/200 ppb), 2 h      (c)  $\text{O}_3/\text{NO}_2$  (200/200 ppb), 10 h

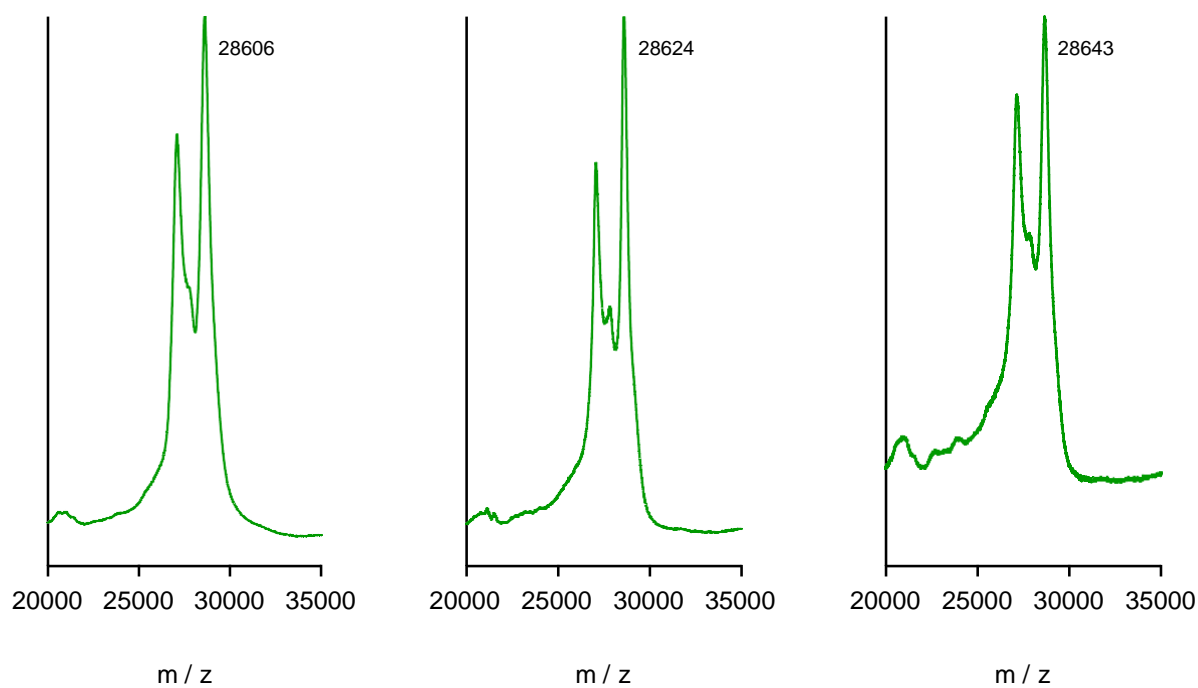

- (d)  $\text{ONOO}^-/\text{Tyr}$  (1/1)      (e)  $\text{ONOO}^-/\text{Tyr}$  (3/1)      (f)  $\text{ONOO}^-/\text{Tyr}$  (5/1)

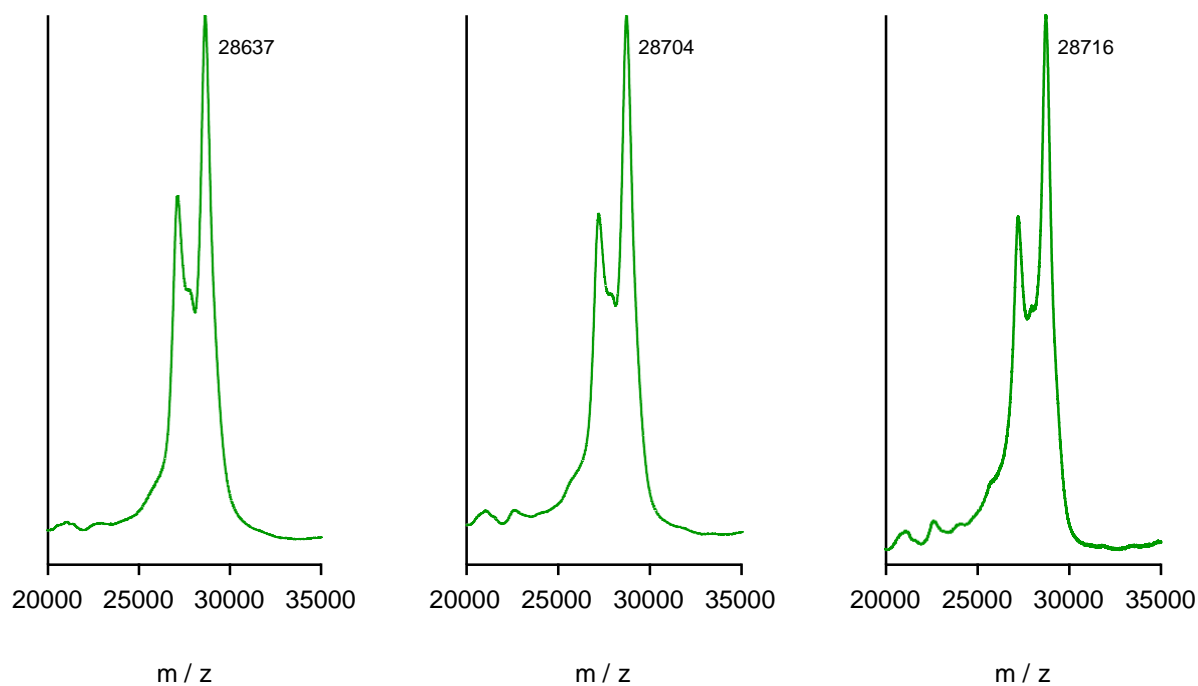

**Figure S2.** MALDI spectra of selected samples.

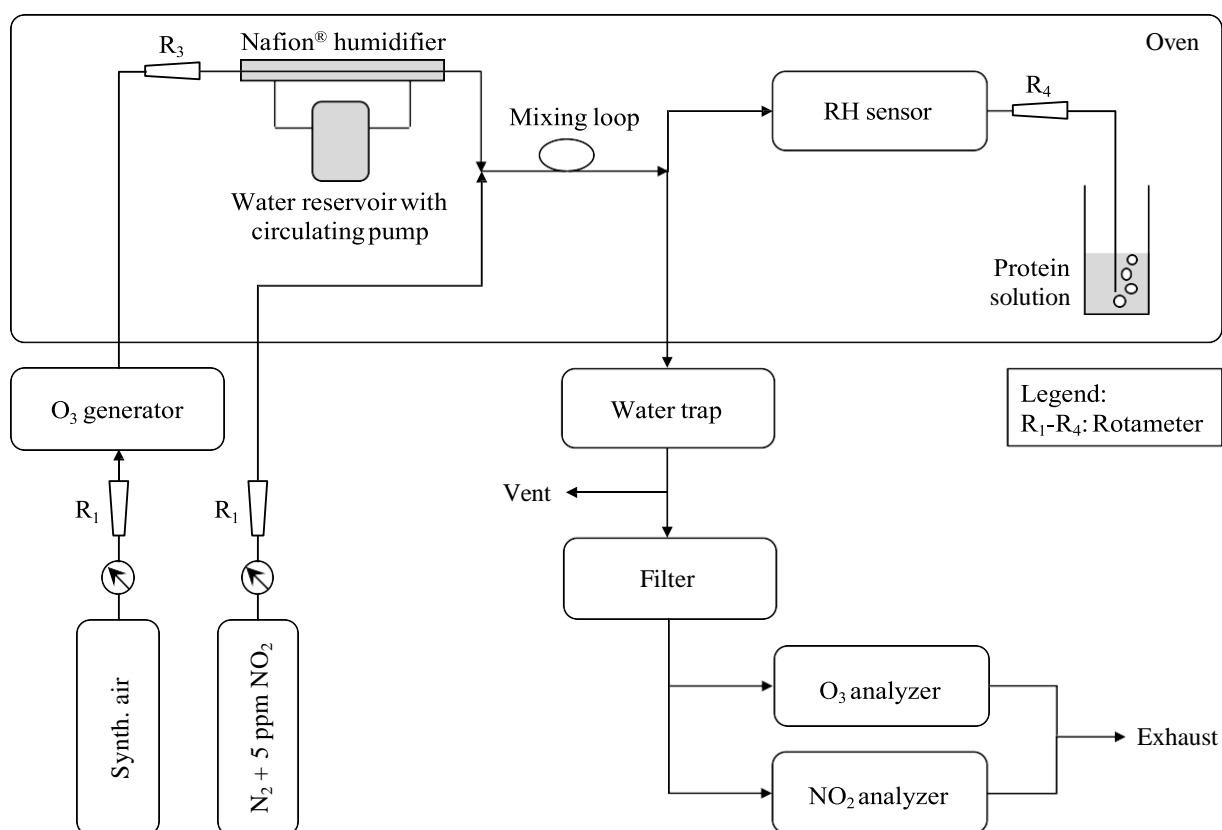

**Figure S3.** Experimental setup used for the exposure of Ph1p5 to O<sub>3</sub> and NO<sub>2</sub>.
